# Integrating MNase-seq and RNA-seq time series data to study chromatin and transcription dynamics under cadmium stress

Trung Q. Tran<sup>1</sup>, Vinay Tripuraneni<sup>2</sup>, Heather K. MacAlpine<sup>2</sup>,  
David M. MacAlpine<sup>2,3,\*</sup>, and Alexander J. Hartemink<sup>1,3,\*</sup>

<sup>1</sup>Department of Computer Science,

Duke University, Durham, NC 27708, USA

<sup>2</sup>Department of Pharmacology and Cancer Biology,

Duke University Medical Center, Durham, NC 27710, USA

<sup>3</sup>Center for Genomic and Computational Biology,

Duke University, Durham, NC 27708, USA

\*To whom correspondence should be addressed:

Tel: +1 919 681 6077, Email: david.macalpine@duke.edu

Tel: +1 919 660 6514, Email: amink@cs.duke.edu

June 29, 2020

## 1 **Abstract**

2 Though the sequence of the genome within each eukaryotic cell is essentially fixed, it  
3 exists in a complex and changing chromatin state. This state is determined, in part,  
4 by the dynamic binding of proteins to the DNA. These proteins—including histones,  
5 transcription factors (TFs), and polymerases—interact with one another, the genome,  
6 and other molecules to allow the chromatin to adopt one of exceedingly many possi-  
7 ble configurations. Understanding how changing chromatin configurations associate  
8 with transcription remains a fundamental research problem. We sought to character-  
9 ize at high spatiotemporal resolution the dynamic interplay between transcription and  
10 chromatin in response to cadmium stress. While gene regulatory responses to envi-  
11 ronmental stress in yeast have been studied, how the chromatin state is modified and  
12 how those modifications connect to gene regulation remain unexplored. By combining  
13 MNase-seq and RNA-seq data, we found chromatin signatures of transcriptional acti-  
14 vation and repression involving both nucleosomal and TF-sized DNA binding factors.  
15 Using these signatures, we identified associations between chromatin dynamics and  
16 transcriptional regulation, not only for known cadmium response genes, but across the  
17 entire genome, including antisense transcripts. Those associations allowed us to de-  
18 velop generalizable models that can predict dynamic transcriptional responses on the  
19 basis of dynamic chromatin signatures.

## 20 **Introduction**

21 Organisms require genic transcription for the production of proteins required for bio-  
22 logical functions including: growth, replication, repair, and response to environmental  
23 changes. Transcription is tightly regulated through the complex interplay between a  
24 myriad of DNA-binding factors (DBFs) such as the histones that make up a nucleosome,  
25 transcription factors (TFs), and polymerases. These proteins and complexes involved  
26 in transcription, and the many others involved in protein-DNA interactions, determine  
27 the chromatin landscape. How these constituents of the chromatin bind, move, evict,  
28 and interact to regulate transcription remains an open area of research.

29 Many studies have made major strides in characterizing the role of the proteins  
30 and complexes involved in transcription. ChIP-based studies have characterized the  
31 role of hundreds proteins involved in transcription on a genomic scale. Among those  
32 include the interaction of factors involved in SAGA-dominated stress-related pathways  
33 and TFIID-dominated housekeeping pathways (Venters *et al.* 2011). Additionally, these  
34 studies have identified protein complexes involved in the formation of the pre-initiation  
35 complex required for transcription initiation (Rhee and Pugh 2012). Through gene ex-  
36 pression analysis of deletion mutants, proteomics, and chromatin immunoprecipitation  
37 (ChIP) studies, the role of numerous chromatin remodelers and their interactions have  
38 been characterized in detail (Lenstra 2011, Weiner 2012, Weiner 2015, Krogan 2006,  
39 Shivaswamy2008-ep). However, these studies are constrained by limitations of their  
40 methods including lack of antibodies for ChIP and viable deletion strains. Analysis is  
41 further complicated by the difficulty in deconvolving direct chromatin effects and the  
42 pleiotropic action of the many factors and remodelers occurring upstream of transcrip-  
43 tion. These aspects contribute to reasons why the chromatin landscape involved in  
44 transcription is still poorly understood.

45 Another approach for profiling the chromatin has been utilized to map the chro-  
46 matin in a protein-agnostic manner using nuclease digestion. Nuclease digestion meth-  
47 ods, including micrococcal nuclease (MNase), provide a complementary perspective  
48 in understanding the chromatin as it can profile chromatin accessibility at base-pair  
49 precision. Recent genome-wide mapping studies have characterized the dynamics of  
50 nucleosomes through the use of nucleosome-sized MNase-seq fragments under vari-  
51 ous conditions including the cell cycle (Nocetti and Whitehouse 2016), DNA damage  
52 (Tripuraneni *et al.* 2019), and heat shock (Teves and Henikoff 2011). Additionally,  
53 studies have attempted to understand the role subnucleosomal MNase-seq fragments  
54 in DNA transactions (Belsky *et al.* 2015; Brahma and Henikoff 2019; Chereji *et al.* 2017;  
55 Henikoff *et al.* 2011; Kubik *et al.* 2017; Ramachandran *et al.* 2017; Teves and Henikoff  
56 2011). These studies highlight the challenge of characterizing the vast heterogene-  
57 ity and interactions between proteins and complexes involved in DNA transactions,  
58 including transcription.

59 Factor agnostic chromatin occupancy profiles from MNase provide an opportunity to  
60 link changes in chromatin occupancy at nucleotide resolution with transcriptional regu-  
61 lation, especially regulation induced by environmental perturbations such as cadmium.  
62 Cadmium is a toxic metal whose deleterious effects have been well-characterized in  
63 yeast. Cadmium toxicity has been shown to induce proteotoxic stress (Faller *et al.*  
64 2005; Gardarin *et al.* 2010; Hartwig 2001; Sharma *et al.* 2008), oxidative stress (Bren-  
65 nan and Schiestl 1996), and inhibition of DNA repair systems (Jin *et al.* 2003). Yeast  
66 respond to cadmium exposure through the activation of stress response genes (Dormer  
67 *et al.* 2000; Hosiner *et al.* 2014; Jin *et al.* 2008) and the repression of ribosome biogen-  
68 esis and translation-related genes (Hosiner *et al.* 2014; Jin *et al.* 2008). While these  
69 cadmium response pathways have been studied extensively through ChIP, proteomics,  
70 and transcription-related studies, the dynamics of the chromatin response have only  
71 been inferred through deletion mutants or estimated through a limited set of ChIP

72 antibodies.

73 Utilizing high-resolution spatiotemporal data, we developed general strategies to  
74 analyze, genome-wide, chromatin dynamics relative to changes in transcription. We  
75 exposed yeast to cadmium and collected data on its chromatin and gene expression  
76 over a two-hour time course. This data allowed us to infer and differentiate essential  
77 cadmium stress response pathways solely from the chromatin. We also identified chro-  
78 matin changes associated with pervasive and potentially regulatory antisense transcrip-  
79 tion. Our identification of unique classes of chromatin changes enabled us to develop  
80 a regression model that can predict the yeast's transcriptional response to cadmium.

## 81 **Results**

82 *Paired-end MNase-seq captures high-resolution chromatin occupancy dynamics associated*  
83 *with transcription during cadmium stress*

84 We sought to characterize the dynamics of the chromatin through changes in occu-  
85 pancy and organizational structure of nucleosomes and transcription-related proteins.  
86 A nucleotide resolution view of chromatin occupancy dynamics in response to cad-  
87 mium stress would allow us to associate and infer relationships between these chro-  
88 matin changes with changes in transcription. Yeast cells were exposed to cadmium and  
89 samples were collected over a two-hour time course (Fig. 1A). Chromatin occupancy  
90 and positioning dynamics were profiled using paired-end MNase-seq to map DBFs at  
91 base pair resolution (Fig. 1B). Concurrently, transcripts were interrogated using strand-  
92 specific total RNA-seq (Fig. 1C).

93 To evaluate our data and methods, we analyzed the chromatin local to the well-  
94 characterized stress response gene HSP26 whose role is to facilitate the disaggregation  
95 of misfolded proteins (Cashikar *et al.* 2005). Hsp26 has been implicated in many stress

96 conditions including heat shock (Benesch *et al.* 2010; Franzmann *et al.* 2008), acid-  
97 ity (Kawahata *et al.* 2006), sulfur starvation (Pereira *et al.* 2008), and metals toxicity  
98 (Hosiner *et al.* 2014; Momose and Iwahashi 2001). Furthermore, several transcrip-  
99 tion factors, including Hsf1, Met4, and Met32, have been found to bind in HSP26's  
100 well-characterized promoter (Boy-Marcotte *et al.* 1999; Carrillo *et al.* 2012; Chen and  
101 Pederson 1993; Susek and Lindquist 1990; Treger *et al.* 1998). The context of these  
102 studies makes HSP26 a valuable gene to study its local chromatin dynamics in an acti-  
103 vating condition.

104 Local to HSP26's transcription start site (TSS) (Fig. 2A), we observe significant  
105 changes to the chromatin coinciding with its increase in transcript-level. Upstream, in  
106 HSP26's promoter, nucleosome-sized fragments of length 144–174 bp are replaced by  
107 small fragments less than 100 bp. In HSP26's gene body, nucleosome-sized fragments  
108 become “fuzzy”, increasing in positional and fragment-length variability (Fig. 2A). Nu-  
109 cleosomes in HSP26's promoter region are evicted (Lee *et al.* 2004) and replaced by  
110 an enrichment of factors associated with transcription initiation pushing nucleosomes  
111 downstream (Fig. 2B). Then, active transcription by RNA polymerases displace and  
112 evict nucleosome histones (Kulaeva *et al.* 2010; Lee *et al.* 2004; Schwabish and Struhl  
113 2004) which is apparent in the significant disruption in HSP26's gene body.

114 Because of these complex transcription-associated chromatin dynamics, we sought  
115 to quantify our MNase-seq data by summarizing the chromatin with two scores, which  
116 would also enable us to characterize subtle chromatin changes genome-wide, not just  
117 at genes with dramatic changes like HSP26. A “promoter occupancy” score was com-  
118 puted by counting the number of small fragments appearing in each gene's promoter  
119 region [–200, TSS] for each time point. We used a core promoter length of 200 bp as  
120 previously described (Lubliner *et al.* 2013; Smale and Kadonaga 2003). Then, because  
121 nucleosomes can be characterized by position changes and variance, in addition to oc-

122 cupancy, a per bp score was computed using a cross-correlation with a well-positioned,  
123 “idealized” nucleosome signal (Fig. 2C). We used the entropy of the +1, +2, and +3  
124 nucleosome cross correlations to define the gene’s “nucleosome disorganization”. To  
125 handle variable RNA stability, we computed transcription rates using difference equa-  
126 tions on the transcript levels and previously obtained decay rates.

127 Using these measures, we are able to succinctly track the coordination between  
128 HSP26’s chromatin dynamics and its increased transcription rate (Fig. 2D). Both of  
129 HSP26’s chromatin scores and its transcription rate increase dramatically throughout  
130 the time course and reach their peaks at 120 minutes. In addition to HSP26, we also  
131 examined the chromatin at genes with repressed (Supplemental Fig. 1) and unchanging  
132 (Supplemental Fig. 2) transcription contexts in response to cadmium and found similar  
133 linkages between changes in chromatin and transcription.

134 We next wanted to determine if this coordination exists genome-wide. The dynam-  
135 ics of the chromatin for each gene were further summarized into a single quantity.  
136 For each gene, their scores for promoter occupancy and nucleosome disorganization  
137 were transformed into a z-score and combined into an average across the time course  
138 (Fig. 3A, B). Sorting by this “combined chromatin” score, we observed a significant  
139 proportion of the genome exhibited a coordination between changes in chromatin and  
140 changes in transcription for genes that are both activated and repressed. A signifi-  
141 cant positive Pearson correlation of 0.49 was computed between the average change  
142 in promoter occupancy and the average change in transcription (Fig. 3C). Similarly, a  
143 correlation of 0.61 was found between the average change in nucleosome disorganiza-  
144 tion and the average change in transcription (Fig. 3D). When measuring the correlation  
145 between the average change in combined chromatin and change in transcription, an  
146 even higher correlation of 0.68 was computed (Supplemental Fig. 3A). This correlation  
147 coupled with the lack of correlation (Supplemental Fig. 3B), at 0.17, between promoter

148 occupancy and nucleosome disorganization themselves suggests that each metric pro-  
149 vides an orthogonal explanation of the chromatin relative to changes in transcription.

150 *Changes in nucleosome and small factor occupancy at TSSs recapitulate the cell's genome-*  
151 *wide transcriptional response to cadmium*

152 We next sought to determine how well chromatin dynamics reflect the cell's stress re-  
153 sponse to cadmium exposure. To answer this, we used the three, previously defined  
154 scores for chromatin dynamics: promoter occupancy, nucleosome disorganization, and  
155 combined chromatin. Using the 300 highest and lowest average scoring genes for each  
156 metric, using an approximately 90% inner percentile range, we performed Gene On-  
157 tology (GO) enrichment analysis to determine regulation pathways implicated under  
158 cadmium exposure. For each chromatin score, discrete GO enrichment pathways were  
159 identified with varying levels of false discovery rate (FDR) significance.

160 A well established response for cells undergoing stress involves shutting down ribo-  
161 somal and translation-related pathways (Hosiner *et al.* 2014; Reja *et al.* 2015; Vinay-  
162 achandran *et al.* 2018). We identified this repression through GO enrichment anal-  
163 ysis as genes with the greatest decreasing promoter occupancy, nucleosome disorga-  
164 nization, and combined chromatin scores. While, the combined score identifies the  
165 translation-related pathways with the greatest significance, many of the terms are re-  
166 covered with FDR less than  $10^{-10}$  by both promoter occupancy and nucleosome disor-  
167 ganization (Fig. 4A).

168 While ribosome and translation-related genes are repressed as a tightly regulated  
169 cluster, pathways activated under cadmium exposure are recovered with less signifi-  
170 cance, with FDRs less than  $10^{-4}$  (Fig. 4B). Consistent with cadmium and heavy metals  
171 stress studies, two major stress responses are activated under cadmium exposure: sul-  
172 fur assimilation and protein folding (Faller *et al.* 2005; Fauchon *et al.* 2002; Hartwig



173 2001). Each metric was able to identify distinct pathways with varying FDR. Promoter  
174 occupancy implicated sulfur assimilation and response to stress pathways with a FDR  
175 of  $10^{-3.9}$ , and nucleosome disorganization recovered protein refolding with an FDR of  
176  $10^{-2.1}$ . The combined chromatin score identified GO terms found distinctly in the pro-  
177 moter occupancy or nucleosome disorganization analyses, and for some terms with a  
178 better FDR, such as with sulfur amino acid metabolic process.

179 In both sets of GO analyses, using the combined chromatin score provides novel  
180 value in identifying implicated GO terms than using each individual metric alone. And  
181 though the cell's response to cadmium has been characterized through gene expression  
182 and ChIP-based studies, we show that elements of the chromatin alone are enough to  
183 accurately recover major cadmium response pathways.

#### 184 *High-resolution time course recovers cascading induction of sulfur pathways*

185 As suggested by GO enrichment, significant chromatin changes occur at genes in the  
186 sulfur metabolic pathways. Utilizing chromatin and transcription data in our time  
187 course, we recover findings previously discovered through decades of ChIP, mutant,  
188 and transcription-related studies (Barbey *et al.* 2005; Blaiseau and Thomas 1998; Car-  
189 rillo *et al.* 2012; Cormier *et al.* 2010; Fauchon *et al.* 2002; Kuras *et al.* 1996, 2002;  
190 McIsaac *et al.* 2012; Ouni *et al.* 2010; Patton *et al.* 2000; Petti *et al.* 2012) and reveal  
191 novel details of the cascade of events regulating these pathways. Yeast cells exposed  
192 to cadmium require sulfur metabolized for biosynthesis of the cadmium-chelating glu-  
193 tathione (Fauchon *et al.* 2002). Genes in the sulfur metabolic pathways are activated  
194 primarily through the transcription factor Met4 and its binding complex, comprised of  
195 cis-binding factors Cbf1 and Met31/Met32, and accessory factor Met28 (Blaiseau and  
196 Thomas 1998; Kuras *et al.* 1996). Met4 is regulated through ubiquitination by SCF<sup>Met30</sup>  
197 either targeting it for degradation or rendering into an inactive, but stable state (Bar-

198 bey *et al.* 2005; Kaiser *et al.* 2000; Kuras *et al.* 2002). Cadmium exposure overrides  
199 this ubiquitination enabling Met4's functional activation of the sulfur metabolic genes  
200 (Barbey *et al.* 2005) (Fig. 5A). Using our calculated transcription rates and measures of  
201 chromatin dynamics, we recover three major components of the sulfur metabolic path-  
202 ways (Fig. 5B): (i) activation of the Met4 complex through its cofactors, (ii) activation  
203 of the sulfur pathways by Met4, and (iii) implicit down-regulation of Met4 activity by  
204 SCF<sup>Met30</sup>, evident in diminished transcription of Met4-regulated genes.

205 Upon deubiquitination, Met4 becomes functionally active and induces its own cofac-  
206 tors (Barbey *et al.* 2005; McIsaac *et al.* 2012). Concomitantly, MET32 is activated and,  
207 with Met4 through feedforward regulation, activates the sulfur metabolic genes (Car-  
208 rillo *et al.* 2012; McIsaac *et al.* 2012). In our time course, this induction is evident not  
209 only in increased transcription within 7.5 minutes for MET32 and MET28, but also in  
210 dramatic nucleosome disorganization in MET32's gene body, (Supplemental Fig. 4) and  
211 small fragment enrichment in MET28's promoter. Meanwhile, MET31's chromatin ex-  
212 hibits more unexpected behavior relative to its change in repressed transcription. While  
213 Met31 shares a binding motif and largely overlaps in function with Met32 (Blaiseau  
214 *et al.* 1997), Met31's role is not as prominent as Met32's in the activation of sulfur  
215 pathways (Carrillo *et al.* 2012; McIsaac *et al.* 2012; Petti *et al.* 2012). In our data, we  
216 observe that while MET31 is repressed, its nucleosomes disorganize with increased an-  
217 tisense transcription (Supplemental Fig. 5). Additionally, downstream of MET31's tran-  
218 scription end site (TES), small fragments become enriched at a Met31/Met32 binding  
219 motif. Taken together, our data identifies MET31 as a potential target for regulation  
220 through non-coding RNA (ncRNA) antisense transcription, a result we explore genome-  
221 wide in a subsequent section.

222 Following activation of MET32 and MET28, the Met4 complex is formed and acti-  
223 vates genes in the sulfur pathways (Carrillo *et al.* 2012; McIsaac *et al.* 2012), which

224 we also observe in the form of increased promoter occupancy, nucleosome disorgani-  
225 zation, and transcription. Each of the seven sulfur assimilation genes (Fig. 5C) and  
226 many of the downstream pathways increase in promoter occupancy and nucleosome  
227 disorganization within 15 minutes.

228 Additionally, Met4 induces a sulfur-sparing transcriptional-switch between func-  
229 tionally similar isoforms to indirectly contribute sulfur required for chelation. This  
230 switch includes replacing sulfur-rich Pdc1 with sulfur-lacking Pdc6, Ald4 with Ald6,  
231 and Eno1 with Eno2 (Fauchon *et al.* 2002). Each of these sulfur-lacking genes show  
232 evidence of activation in both their chromatin and transcription and, consistent with  
233 known studies (Fauchon *et al.* 2002), the most dramatic changes are evident as small  
234 fragment occupancy changes in PDC6 (Supplemental Fig. 6), PDC1 and ENO1's pro-  
235 moter.

236 Following the induction of the sulfur pathways, Met32 and Met4's activating func-  
237 tions diminish. Because prolonged activity of Met32 and Met4 induces cell cycle arrest,  
238 regulation of Met4 and Met32 through SCF<sup>Met30</sup> is required for long-term cell prolifer-  
239 ation (Ouni *et al.* 2010; Patton *et al.* 2000). These events are present most clearly in  
240 the chromatin dynamics for MET30 and MET32. We observe increasing transcription  
241 and gradual disorganization of gene body nucleosomes through the 120-minute time  
242 course. Additionally, we observe evidence for Met4 facilitating regulation of MET32  
243 (Ouni *et al.* 2010) through a plateau of MET32's nucleosome disorganization and tran-  
244 scription from 60–120 minutes.

245 Taken together, we are able to detail the timing of the activation of the Met4 com-  
246 plex, induction of the sulfur genes, and subsequent down-regulation of Met4 activity  
247 (Fig. 5D). This analysis complements established transcriptional studies by detailing  
248 chromatin dynamics of the sulfur metabolic pathways and identifying a potentially  
249 novel regulatory mechanism for MET31 through antisense transcription.

250 *Cadmium treatment induces chromatin dynamics as distinct temporal clusters, including*  
251 *those linked to antisense transcription*

252 Our results demonstrate that the temporal order of chromatin changes were tightly as-  
253 sociated with the transcriptional regulation of sulfur pathways. Additionally, we found  
254 examples in which chromatin dynamics may not strictly correlate with sense transcrip-  
255 tion. With these observations in mind, we sought to understand the timing of the  
256 chromatin dynamics associated with cadmium stress using hierarchical clustering. We  
257 identified eight clusters, to identify generalized patterns, among 832 genes, chosen  
258 because they were among the 500 most dynamic in either promoter occupancy or nu-  
259 cleosome disorganization (some genes were in both, which is why there are fewer than  
260 1000; Fig. 6A). GO enrichment analysis was then performed on each cluster. Cluster-  
261 ing and GO enrichment analysis revealed three major results: (i) the sulfur and protein  
262 folding pathways can be differentiated through the timing of changes in the chromatin,  
263 (ii) increased transcription may not always accompany nucleosome disorganization,  
264 and (iii) antisense transcription can explain anti-correlated chromatin dynamics.

265 GO analysis of the eight clusters reveals differences in the timing of the the protein  
266 folding and sulfur metabolic pathways (Fig. 6B. Cluster 1, enriched with sulfur assim-  
267 ilation and methionine metabolic process genes, show an increased and steady state  
268 of promoter occupancy and nucleosome disorganization, consistent with the previous  
269 results. In cluster 2, genes relating to ATPase activity and protein refolding are acti-  
270 vated between 7.5–15 minutes, repressed between 30–60 minutes, and reactivated by  
271 120 minutes, evident in the change in promoter occupancy, nucleosome disorganiza-  
272 tion, and transcription rate for the latter 10% of genes in the cluster, genes that can be  
273 differentiated further with a higher  $k$ . Clusters 1 and 2 show that not only does the  
274 chromatin recover activating stress response pathways, but it also differentiates their  
275 temporal changes consistent with changes in transcription rate.

276 While most genes presented thus far have shown to have a positive correlation  
277 between their changes in each chromatin measure and their change in transcription,  
278 clusters 6–8 reveal an unexpected anti-correlated relationship. While the transcription  
279 of many of these genes are activated, these genes show either a decrease in promoter  
280 occupancy and increase in nucleosome disorganization (in clusters 5 and 6), or an in-  
281 crease in promoter occupancy and decrease in nucleosome disorganization (in clusters  
282 7 and 8). This suggest more complex chromatin dynamics at play than the directly  
283 correlated measures we previously described. An example of this complexity is present  
284 in cluster 7, where the gene coding for an endoplasmic reticulum membrane protein  
285 Mcd4 exhibits chromatin with counter-intuitively organized nucleosomes despite in-  
286 creased transcription. (Supplemental Fig. 7).

287 For genes in cluster 6, some of the anti-correlated phenomena can be attributed  
288 to the antisense transcription (Fig. 6C) previously identified in MET31. Antisense  
289 transcription presents itself genome-wide with varying changes in sense transcription  
290 (Fig. 7A). We observed two major phenomena consistent with existing studies with  
291 respect to antisense transcription. First, as identified in other environmental condi-  
292 tions (Kim *et al.* 2010; Till *et al.* 2018; Wilhelm *et al.* 2008), antisense transcription  
293 is induced pervasively in yeast undergoing cadmium stress. The distribution of genes  
294 with increased antisense transcripts monotonically skews towards more transcription  
295 through the 120-minute time course (Fig. 7B). Of the genes whose sense transcrip-  
296 tion is unchanging, we found 529 exhibit a four-fold increase in antisense transcription  
297 (Fig. 7C). The second phenomena we observed pertains to genes whose sense transcrip-  
298 tion have changed. Previous studies have found that antisense transcription to be asso-  
299 ciated with both repression or activation of target genes (Kornienko *et al.* 2013; Swamy  
300 *et al.* 2014; Till *et al.* 2018; Vance and Ponting 2014). Under cadmium stress, we identi-  
301 fied 92 genes whose antisense transcripts increased with decreased sense transcription,  
302 such as with MET31 and UTR2, whose overexpression has been linked with endoplas-

303 mic reticulum stress (Miller *et al.* 2010) (Supplemental Fig. 8). We found 125 genes  
304 increased in both sense and antisense transcription, including the gene YBR241C (Sup-  
305 plemental Fig. 9) coding for a vacuole localization protein (Wiederhold *et al.* 2009).  
306 These phenomena indicate that changes in the chromatin may not strictly be associated  
307 with transcription, at least not solely on the sense strand.

308 While chromatin dynamics are able to accurately recover and differentiate the tim-  
309 ing of known stress response pathways, new questions are raised when these dynamics  
310 are not strictly correlated with sense transcription. Complexities introduced by the het-  
311 erogeneity of DBF binding dynamics and interactions and transcription on the antisense  
312 strand indicates that a more complex model of the chromatin landscape is required in  
313 elucidating the relationship between chromatin behavior and gene expression.

#### 314 *Chromatin occupancy changes are predictive of changes in gene expression*

315 We next sought to develop a model to quantify the relationship between our measures  
316 of the chromatin and changes in transcription. We constructed a Gaussian process  
317 regression model to predict the transcription at each time point based solely on chro-  
318 matin dynamics and the preinduction transcription levels at 0 min. We constructed  
319 four models to evaluate various inclusions of measures of the chromatin, including a  
320 “full” model incorporating nucleosome positional shift calls (Supplemental Fig. 10) and  
321 measures of chromatin relative to called antisense transcripts (Supplemental Fig. 11).

322 We then evaluated each model using 10-fold cross-validation and the coefficient  
323 of determination ( $R^2$ ), as the model’s proportion of predictable variance (Fig. 8A).  
324 For each model excepting the intercept model, prediction performance becomes worse  
325 through the time course as the transcript level deviates from the 0 minute transcript  
326 feature. However, models including features of the chromatin consistently outperform  
327 the model using 0 min transcript level alone. Nucleosome disorganization is more in-

328 formative than promoter occupancy and, consistent with previous results, combining  
329 both metrics provides more predictive power than each alone. The full model is not  
330 the best between 7.5–15 minutes because prediction is mainly driven by 0 minute tran-  
331 script level early on (Fig. 8B). It outperforms all other model between 30–120 minutes  
332 maintaining an  $R^2$  greater than 0.4 two hours after the cell's exposure to cadmium  
333 (Fig. 8C, D).

334 While our metrics do not describe the full state and variability of the chromatin  
335 landscape during transcription, our regression model provides evidence that a propor-  
336 tion of transcription can be explained from modifications of the chromatin state. This  
337 model serves as a baseline for understanding a portion of the complex relationship  
338 between the chromatin and transcription with numerous opportunities for extension.

## 339 Discussion

340 In contrast to ChIP-based studies, our study surveys the occupancy of DBFs across the  
341 entire genome without explicit information on the identities of the DBFs. While nu-  
342 cleosomes are well-characterized by nuclease digestion studies, profiling TFs and com-  
343 plexes that affect gene expression is a more challenging, open problem. Studies have  
344 identified the dynamics of various promoter-binding factors including transcription fac-  
345 tors, general transcription factors, polymerases, mediator, SAGA, TFIID, histone mod-  
346 ifications, chromatin remodelers, and others (Chereji *et al.* 2017; Huisinga and Pugh  
347 2004; Reja *et al.* 2015; Rhee and Pugh 2012; Shivaswamy and Iyer 2008; Venters *et al.*  
348 2011; Vinayachandran *et al.* 2018; Weiner *et al.* 2012, 2015). Utilizing both literature  
349 and motif analysis of TFs, we can implicitly describe the activity evident within gene  
350 promoters, such as with HSP26. Additionally, well-characterized responses, such as the  
351 sulfur pathways, allow for additional context in determining the logical sequencing of  
352 chromatin modification events and modal changes in gene expression.

353 Analysis of the gene encoding Met4 cofactor Met31 uncovered chromatin changes,  
354 not only linked with gene expression, but also with antisense transcription. While per-  
355 vasive and regulatory ncRNA and antisense transcription have previously been shown  
356 to be associated with environmental perturbation (Camblong *et al.* 2007; Nadal-Ribelles  
357 *et al.* 2014; Swamy *et al.* 2014; Toesca *et al.* 2011), we characterized the relationship  
358 between these transcripts with gene expression from the perspective of the chromatin.  
359 Including the chromatin measures for the 667 genes with antisense transcripts also  
360 provides a marginal benefit in predicting sense transcripts (Fig. 8A). This benefit can  
361 be explored further by narrowing in on the effect size of these antisense-related chro-  
362 matin measures and by examining the individual sets of genes whose gene expression  
363 appears to have a relationship with antisense transcription.

364 Using the initial transcript level and chromatin dynamics of both sense and anti-  
365 sense transcription, our regression model is able to predict the level of sense transcript  
366 with an  $R^2$  greater than or equal to 0.44 for all time points following cadmium exposure  
367 Fig. 8A. There are multiple opportunities to extend this model. Further quantifying of  
368 the chromatin may include additional classes of fragments and characterization of the  
369 chromatin outside our defined [-200, 0] bp promoter and [0, 500] bp gene body. Addi-  
370 tionally, this data set enables opportunities for modeling using other statistical methods  
371 including generalized linear models, deep neural networks, or random forests. This  
372 model and its predictions serve as a baseline showing the potential modeling opportu-  
373 nities and richness of statistical power of the chromatin.



## 374 **Materials and Methods**

### 375 *Yeast strain*

376 The yeast strain used in this study has the W303 background with the genotype: MATa,  
377 leu2-3,112, trp1-1, can1-100, ura3-1, ade2-1, his3-11,15.

### 378 *Cell growth*

379 Cells were grown asynchronously in rich medium at 30°C to an OD<sub>600</sub> of 0.8. A sample  
380 was removed and crosslinked for MNase-seq and another was pelleted and flash frozen  
381 for RNA-seq at time 0 before the addition of CdCl<sub>2</sub> to a final concentration of 1mM.  
382 Samples were taken at 7.5 min, 15 min, 30 min, 60 min, and 120 min following CdCl<sub>2</sub>  
383 addition. All samples were taken and processed in duplicate.

### 384 *Chromatin preparation*

385 Chromatin was prepared as previously described (Belsky *et al.* 2015).

### 386 *RNA-seq*

387 RNA was prepared using the Illumina TruSeq Stranded Total RNA Human/Mouse/Rat  
388 kit (Cat number RS-122-2201) following the protocol provided by Illumina with Ribo-  
389 Zero.

### 390 *Sequencing library preparation*

391 Illumina sequencing libraries of MNase-treated DNA were prepared using 500 ng of  
392 DNA as previously described (Henikoff *et al.* 2011).

393 *Sequencing read alignment to the genome*

394 All reads were aligned to the sacCer3/R64 version of the *S. cerevisiae* genome using  
395 Bowtie 0.12.7 (Langmead *et al.* 2009). The recovered sequences from all paired-end  
396 MNase reads were truncated to 20bp and aligned in paired-end mode using the follow-  
397 ing Bowtie parameters: -n 2 -l 20 -m 1 -k 1 -X 1000.

MNase-seq duplicates,  $A$  and  $B$ , were randomly subsampled and merged to reduce bias from library preparation, sequencing, and MNase digestion.

$$A = \{a_0, a_{7.5}, a_{15}, a_{30}, a_{60}, a_{120}\}$$

$$B = \{b_0, b_{7.5}, b_{15}, b_{30}, b_{60}, b_{120}\}$$

Separately for each duplicate, the time point with the fewest reads determined the subsampling depth ( $k_A$  and  $k_B$ ):

$$T = \{0, 7.5, 15, 30, 60, 120\}$$

$$k_A = \min_{t \in T} |a_t|, \quad k_B = \min_{t \in T} |b_t|$$

Each duplicate was then subsampled (uniformly at random) to its respective subsampling depth to form new sets  $A'$  and  $B'$ :

$$A' = \{a'_0, \dots, a'_{120}\}$$

$$B' = \{b'_0, \dots, b'_{120}\}$$

$$|a'_t| = k_A, \quad |b'_t| = k_B, \quad \forall t \in T$$

Finally, the subsampled duplicates were merged into a superset,  $M$ , for downstream analysis:

$$M = \{m'_0, \dots, m'_{120}\} = \{a'_0 \cup b'_0, \dots, a'_{120} \cup b'_{120}\}$$

398 *Selection of gene set*

399 We compiled a set of 4,427 genes for analysis. Genes were chosen according to five  
400 criteria: (i) classified as either verified or uncharacterized by sacCer3/R64, (ii) contains  
401 an open reading frame (ORF) at least 500 bp long, (iii) contains an annotated TSS, (iv)  
402 has an estimated half-life value, and (v) has adequate MNase-seq coverage.

403 Genes whose ORFs are less than 500 bp (Supplemental Fig. 12A) long were omitted  
404 in order to ensure valid “gene body” calculations between [TSS, +500]. TSS annota-  
405 tions were determined by (Park *et al.* 2014). For four important sulfur-related genes,  
406 Sul1, Sul2, Met32, and Hsp26, TSS annotations were manually annotated to be con-  
407 sistent with this study’s RNA-seq data. A half-life was required for each gene in order  
408 to estimate valid transcription rates. MNase-seq coverage was computed in a 2,000 bp  
409 window centered on each gene’s TSS. A position in this window is considered “covered”  
410 when there exists at least one read whose center lies on this position. MNase coverage  
411 was then defined as the number of covered positions in this window divided by the  
412 the length of the window, 2,000 bp. Genes with MNase coverage below 0.85 ( $n=109$ )  
413 were excluded from further analysis (Supplemental Fig. 12B).

414 *Classification of MNase-seq fragments and occupancy*

415 For each gene, two regions were defined relative to their TSS. The promoter region was  
416 defined as a 200 bp region upstream of the TSS, [-200, TSS]. This region was chosen  
417 as a length previously described by (Lublimer *et al.* 2013; Smale and Kadonaga 2003).  
418 The gene body region was defined as the 500 bp region downstream of the TSS, [TSS,  
419 +500], to include the +1, +2, and +3 nucleosomes.

420 To compute metrics against nucleosome and small factor binding signals, two ref-  
421 erence data sets were used. Nucleosome-related metrics were computed by examining

422 the MNase-seq fragment distribution at 2,500 unique nucleosome positions mapped  
423 by a highly sensitive chemical mapping methodology (Brogaard *et al.* 2012). Small  
424 factors metrics were computed using 151 Abf1 binding sites determined through phy-  
425 logenetic conservation and motif discovery (MacIsaac *et al.* 2006). Prior studies have  
426 found clear signals of small MNase-seq fragment enrichment at Abf1 sites (Henikoff  
427 *et al.* 2011). MNase-seq distributions at each reference set was examined at 0 minutes,  
428 prior to cadmium treatment.

429 Reads were further delineated as nucleosome-sized fragments, those between 144–  
430 174 bp long, or small fragments, those less than 100 bp long. A mode length of 159 bp  
431 was computed at the MNase-seq fragments at (Brogaard *et al.* 2012) sites. A  $\pm 15$  bp  
432 range around this 159 bp mode length was chosen for nucleosome-sized fragments. A  
433 mode length of 75 bp was computed at (MacIsaac *et al.* 2006) sites. Fragments less  
434 than 100 were chosen to be small fragments. Occupancy was then defined by counting  
435 the number of fragment centers in these regions with the designated fragment lengths.  
436 Occupancy was calculated for small fragments in the promoter, nucleosome fragments  
437 in the promoter, small fragments in the gene body, and nucleosome fragments in the  
438 gene body.

### 439 *Signal processing of chromatin*

440 A cross-correlation was computed in a similar manner described in (Tripuraneni *et al.*  
441 2019). Around each gene's TSS, a per bp cross-correlation score was computed to  
442 smooth the positional variation and filter out non-relevant fragments. Three two-  
443 dimensional cross-correlation kernels were constructed, an “idealized”, well-positioned  
444 nucleosome (Supplemental Fig. 13A) kernel, a clearly bound small factor kernel (Sup-  
445 plemental Fig. 13B), and a triple nucleosome “gene body” summarization kernel (Sup-  
446 plemental Fig. 13C). Each kernel was applied to the region local to each gene's TSS for

447 each time point to compute a per bp cross-correlation score (Supplemental Fig. 13D).

448 The nucleosome and small factor kernels were constructed using a bivariate Gaus-  
449 sian distribution parameterized by the mean and variance for the position and length  
450 for MNase-seq fragments. The parameters for each kernel were determined using the  
451 fragment length and position distributions at positions in (Brogaard *et al.* 2012) and  
452 (MacIsaac *et al.* 2006) previously described in *Classification of MNase-seq fragments and*  
453 *occupancy*.

454 To summarize the gene body chromatin as a whole, a three nucleosome, “triple”  
455 kernel was constructed to dampen the effect of the +1 nucleosome becoming more  
456 poised to be well-positioned (Nocetti and Whitehouse 2016). The triple nucleosome  
457 kernel was constructed by repeating the nucleosome kernel and increasing the vari-  
458 ance to take into account variable linker spacing. The nucleosome kernel spacing was  
459 determined using the average peak spacing between the [+1,+2] and the [+2,+3]  
460 nucleosome cross correlation scores Supplemental Fig. 13E.

#### 461 *Quantifying nucleosome disorganization*

For each gene, a random variable  $X$  was defined with  $n$  possible outcomes representing  
each position to evaluate relative to the gene TSS.

$$X = \{1, \dots, n\}$$

462 The probability of each outcome is estimated using the triple nucleosome cross corre-  
463 lation scores previously defined and normalized to sum to 1.

Because the triple kernel computes a score for three approximately adjacent nucle-  
osome positions, we set  $n = 150$  to summarize the disorganization of the first three

nucleosomes in the gene body starting with +1 within the [0, 150] window.

$\text{cross}_{\text{nuc}}(i)$  = nucleosome cross correlation at  $i$

$$\hat{p}(X = x_i) = \frac{\text{cross}_{\text{nuc}}(i)}{\lambda}, \quad \text{where } \lambda = \sum_i^n \text{cross}_{\text{nuc}}(i)$$

Using this random variable, a score was computed for each gene to define its “nucleosome disorganization” using information entropy (Supplemental Fig. 13F):

$$H(X) = - \sum_{i \in 1 \dots n} P_X(x_i) \cdot \log_2 P_X(x_i)$$

#### 464 *Calling +1, +2, +3 nucleosomes*

465 Nucleosomes were called using the peak nucleosome cross correlation scores local to  
466 each gene’s TSS. The peak scores per bp of a 1000 bp window around the TSS were  
467 sorted, and with the largest peak iteratively removed. Positions within 150 bp around  
468 each peak were also removed and this value and position was called as a nucleosome.  
469 This procedure was repeated until all positions were removed and nucleosomes were  
470 called for this 1000 bp window.

471 “Linked” nucleosomes are defined as nucleosomes across the time course that nom-  
472 inally represent the same underlying nucleosome that may have changed in position  
473 or “fuzziness”. Nucleosomes were linked across time points using a nearest neighbor  
474 approach. In a greedy manner, the nucleosome the lowest disorganization score, the  
475 most well-positioned, was considered first. The position of this nucleosome was used to  
476 identify the linked nucleosomes in previous and subsequent time points by considering  
477 the nearest nucleosome for their respective time points within 100 bp of the original  
478 nucleosome’s position.

479 +1 nucleosomes were called by identifying linked nucleosomes closest to the TSS.  
480 +2 and +3 nucleosomes were computed as the next set of nucleosomes at least 80 bp  
481 downstream from their neighboring nucleosome.

482 *Gene Ontology enrichment analysis*

483 GO enrichment analysis was performed using GOATOOLS (Klopfenstein *et al.* 2018)  
484 with the go-basic.obo annotations from the Gene Ontology Consortium (Ashburner  
485 *et al.* 2000; The Gene Ontology Consortium 2019). False discovery rate was correcting  
486 using the Benjamini-Hochberg procedure (Benjamini and Hochberg 1995).

487 *Identification of transcription factor binding sites*

488 TF binding sites were identified with FIMO (Grant *et al.* 2011) using the motif database  
489 from MacIsaac *et al.* (2006) and default p-value threshold. Selected binding sites with  
490 supporting literature were annotated on typhoon plots.

491 *Transcription rate estimation*

As previously described in (Cashikar *et al.* 2005; Rabani *et al.* 2011; Yang *et al.* 2003),  
transcription rates were computed for each gene using a zero-order growth with first-  
order decay relationship:

$$\begin{aligned}\frac{dC_i}{dt} &= R_i - k \cdot C_i \\ C_i &= \frac{R_i}{k} + G_i \cdot e^{-kt_i} \\ t_i &\in \{7.5, 15, 30, 60, 120\}, \text{ s.t. } i \in \{1, \dots, 5\}\end{aligned}$$

Where  $C_i$  is the total RNA concentration measured by RNA-seq for sample  $i$ ,  $k$  is the  
fixed decay rate,  $G_i$  is the concentration of RNA affected by the zero order growth,  
and  $R_i$  is the unknown transcription rate. Assuming a constant rate of transcription  
between time points,  $R_i$  and  $G_i$  can be solved through pairs of difference equations:

$$\begin{aligned}C_{i-1} &= \frac{R_i}{k} + G_i \cdot e^{-k \cdot t_{i-1}} \\ C_i &= \frac{R_i}{k} + G_i \cdot e^{-k \cdot t_i}\end{aligned}$$

492 Transcription rates for  $R_i, i \in \{7.5, 15, 30, 60, 120\}$  were computed as systems of differ-  
493 ence equations between pairs of RNA-seq measurements to compute  $G_i$  and  $R_i$ .

Similarly, steady-state transcription rates,  $R_0$  at  $t_0$  were computed by setting the rate of production equal to the rate of decay:

$$t_0 = 0, i = 0$$

$$R_0 = k \cdot C_0$$

494 Decay rates were computed using the average half-life values,  $\tau$  between (Geisberg  
495 *et al.* 2014; Miller *et al.* 2011; Presnyak *et al.* 2015) and  $k = 1/\tau$ . Computed transcrip-  
496 tion rate values were then truncated to 0.1 TPM/min for valid fold-change evaluation.

#### 497 *Clustering of chromatin measures*

498 Clustering was performed using hierarchical clustering through SciPy (Virtanen *et al.*  
499 2020) for its flexibility in determining  $k$ . The Ward linkage was used for its efficient  
500 approximation to the minimal sum of squares objective (Ward 1963).

501 832 genes were chosen for clustering from the union of the 500 greatest increase  
502 in average promoter occupancy or 500 greatest increase in average nucleosome dis-  
503 organization, genes outside of an approximately 75% inner percentile range for each  
504 measure.

505 Clustering was performed against the pair-wise Euclidean distances between the  
506 z-score normalized measures of change in promoter occupancy and nucleosome dis-  
507 organization. Clustering to  $k=8$  was chosen to balance the interpretability of fewer  
508 clusters with the significance of identified GO terms in smaller, but more numerous  
509 clusters.



510 *Computing antisense transcription metrics*

511 Antisense transcript levels were quantified using a TPM calculation defined by (Wagner  
512 *et al.* 2012) for strand-specific RNA-seq reads on the antisense strand in the ORF for  
513 each gene.

514 TSSs and transcription end sites (TES) for antisense transcripts was identified using  
515 RNA-seq pileup, the number of reads covering a genomic position. To increase the  
516 signal of fully transcribed transcripts, per-position pileup values were summed across  
517 each time point into a cumulative pileup and smoothed using a Gaussian kernel.

518 Antisense transcripts were identified starting with the highest cumulative pileup  
519 value within a gene's ORF on the antisense strand. The antisense TSS and TES were  
520 each identified by progressively searching upstream and downstream to identify the po-  
521 sitions in which the cumulative pileup values are minimized (Supplemental Fig. 11A).  
522 Antisense transcripts were not called if they did not meet a minimum threshold.

523 For the 667 genes in which an antisense transcript could be called (Supplemental  
524 Fig. 11B), nucleosome disorganization and promoter occupancy measures were com-  
525 puted, as previously described on the sense strand, relative to the antisense TSSs.

526 *Transcript level prediction model*

527 Gaussian process regression models were constructed to predict the  $\log_2$  transcript level  
528 for each time point using the  $\log_2$  transcript level at time 0, features of the chromatin  
529 at 0 minutes, and features of the chromatin for the time being predicted.

530 Four models were constructed to compare various combinations of measures of the  
531 chromatin: a small fragments promoter occupancy model, a gene body nucleosome  
532 disorganization model, a combined chromatin model, and a full model incorporating

533 all previous models' features with the addition of +1, +2, and +3 nucleosome position  
534 shift relative to 0 min (Supplemental Fig. 10) and measures of chromatin relative to  
535 called antisense transcripts (Supplemental Fig. 11).

536 Each Gaussian process regression model developed using `scikit-learn` (Pedregosa  
537 *et al.* 2011) with a radial-basis function (RBF) kernel with length scale bounded be-  
538 tween 0.1 and 100 and a white kernel with noise level  $10^{-4}$  as priors for covariance.  
539 The length scale bounds and noise parameters were determined empirically through a  
540 sensitivity analysis on a subset of the data.

541 Promoter occupancy and nucleosome disorganization measures were log transformed  
542 to an approximately normal distribution. Then, each chromatin measure, including  
543 nucleosome shift, was z-score normalized so that the RBF length parameter could be  
544 successfully approximated.

545 Performance for each model was evaluated using the coefficient of determination,  
546  $R^2$ , under 10-fold cross validation.

## 547 **Acknowledgments**

548 The authors would like to thank Sneha Mitra, Yulong Li, and Greg Crawford for pro-  
549 viding suggestions and critical comments for the analyses in this manuscript.

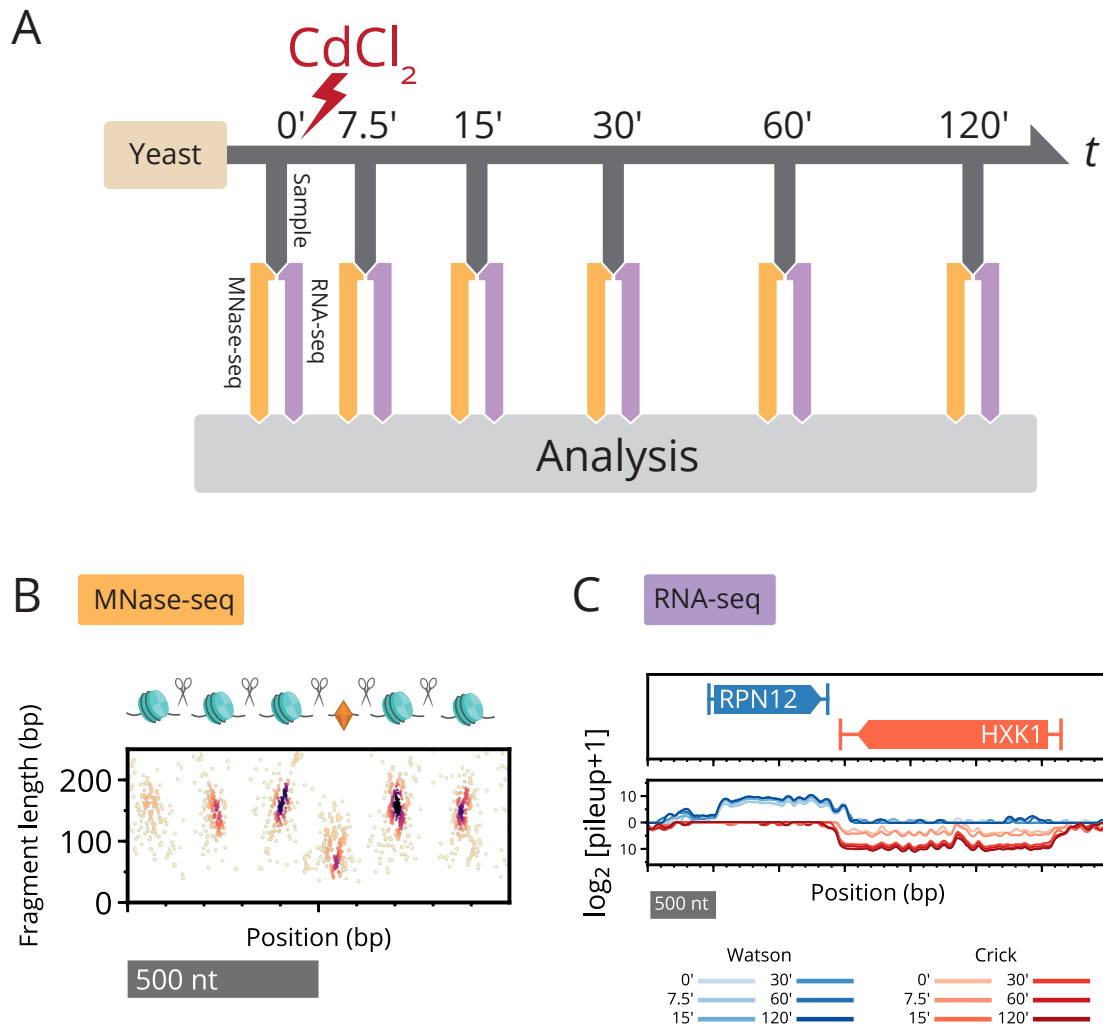

**Figure 1.** Paired-end MNase-seq and stranded RNA-seq capture high-resolution chromatin occupancy and transcriptome state throughout a perturbation time course. **(A)** Overview of cadmium perturbation experiment in which paired-end MNase-seq and strand-specific RNA-seq samples were collected immediately prior to cadmium exposure and for five additional time points over two hours. **(B)** Depiction of nucleosomes flanking a small (subnucleosomal) binding factor, and fragments that result upon digestion by MNase. Paired-end MNase-seq fragments are plotted based on their center position and length. **(C)** Strand-specific RNA-seq is plotted as the  $\log_2$  pileup, the number of total RNA-seq reads at each genomic position, separately mapped to Watson (blue) and Crick (red) strands. Changing RNA-seq read levels over the time course are plotted using progressive coloring for each strand.

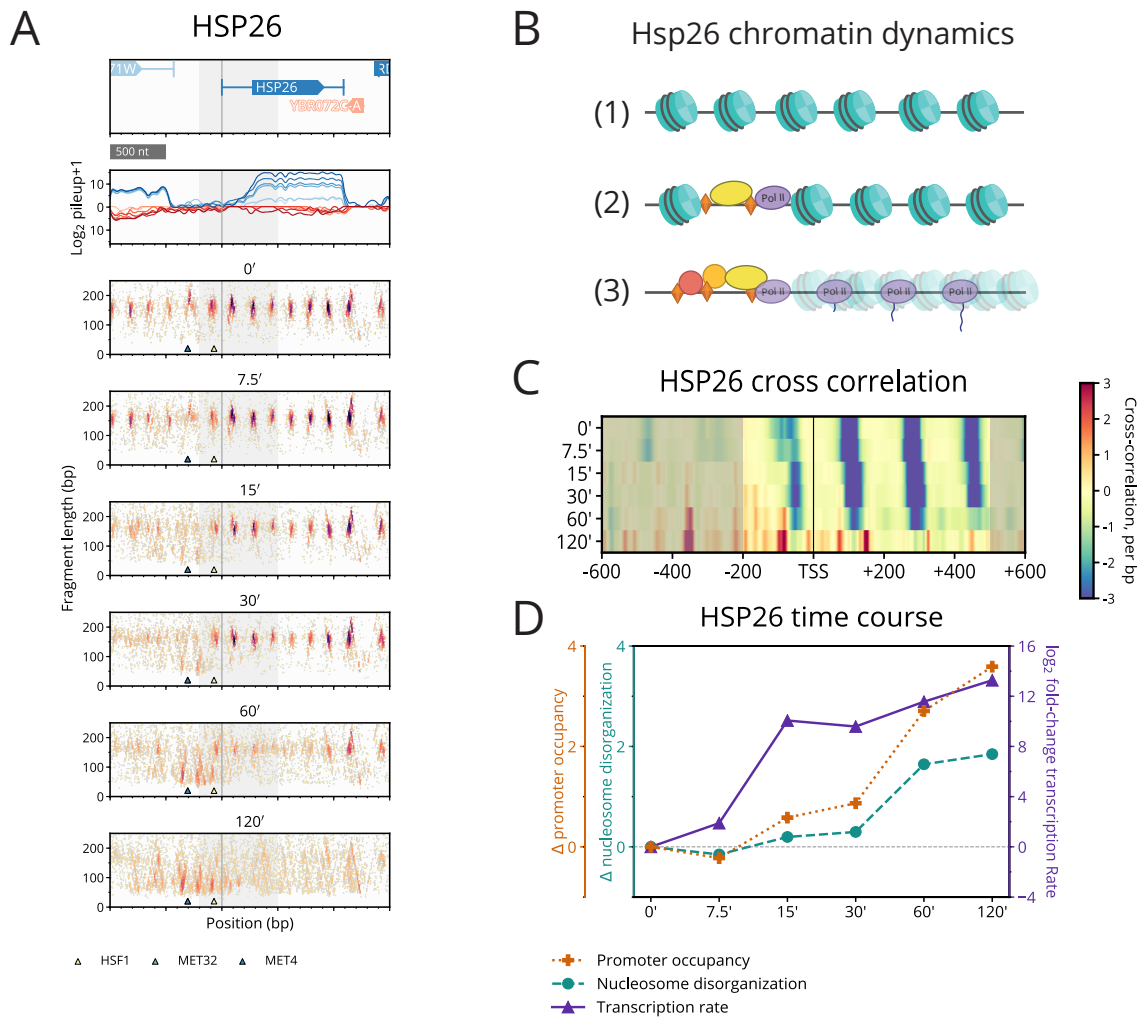

**Figure 2.** Cadmium induces local chromatin dynamics that correlate with transcription of HSP26. **(A)** Typhoon plot shows dynamics of MNase-seq and RNA-seq data near HSP26. Nucleosomes in the promoter region are replaced by small fragments, while gene body nucleosomes disorganize (grey shading highlights the  $[-200,500]$  region around the TSS that we analyze for all genes). Small fragments appear around motifs for known regulators Hsf1 (yellow triangle), Met4 (blue triangle), and Met32 (obscured by blue triangle) **(B)** Depiction of HSP26's chromatin dynamics. (1) Before treatment, nucleosomes are well-positioned. (2) Between 15–30 minutes, nucleosomes are evicted from the promoter region and replaced by transcription-related proteins and complexes. (3) By 60–120 minutes, nucleosomes are fuzzy and polymerases are actively transcribing HSP26. **(C)** Heatmap of differential cross-correlation values of HSP26 through time course, summarizing how gene body nucleosomes initially shift downstream and then disappear, and how promoter nucleosomes are rapidly displaced as small fragments accumulate. Higher values (more red) indicate higher cross-correlation with subnucleosome fragments; lower values (more blue) indicate a stronger signal for nucleosome fragments. **(D)** Line plot of HSP26 time course summarizing the change relative to 0 min in occupancy of promoter small fragments (orange), disorganization of gene body nucleosomes (turquoise), and transcription rate (purple).

550

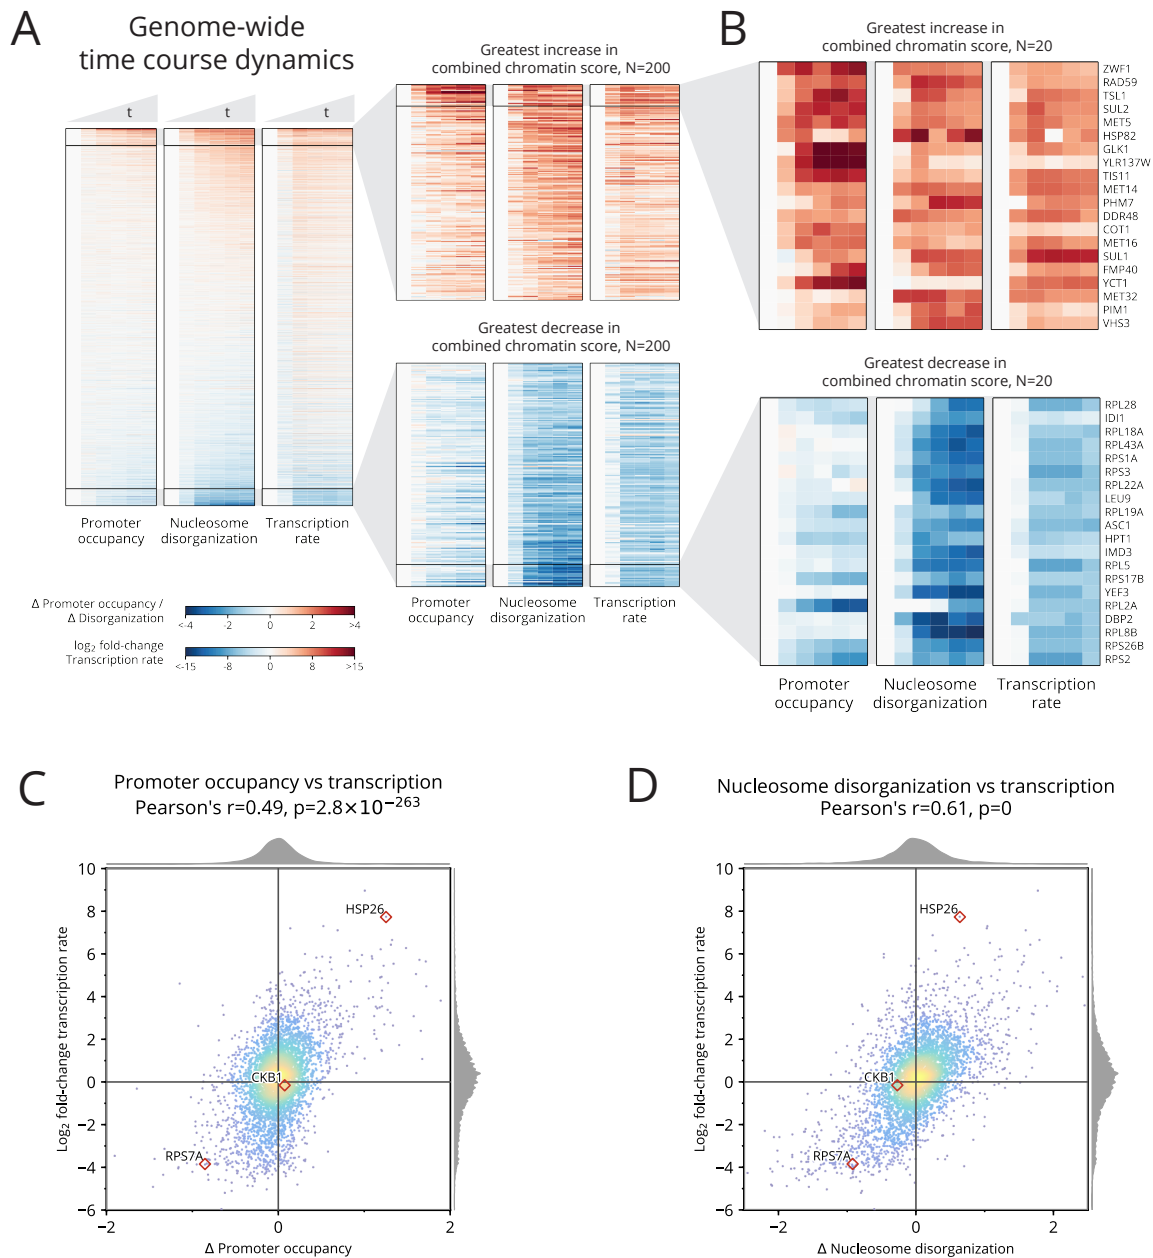

**Figure 3.** Cadmium induces genome-wide chromatin dynamics that correlate well with genome-wide transcriptional dynamics. **(A)** Heatmaps of changes in chromatin occupancy measures and transcription rate for all genes and all times, relative to 0 min (left: promoter small fragment occupancy; middle: gene body nucleosome disorganization; right: transcription rate). Genes (rows) are sorted by combined chromatin score. **(B)** Detailed heatmaps of the 20 genes whose combined chromatin scores increase (top) or decrease (bottom) most. **(C)** Scatter plot of relationship between change in promoter occupancy and change in transcription rate, each averaged over the time course. **(D)** Scatter plot of relationship between change in nucleosome disorganization and change in transcription rate, each averaged over the time course.

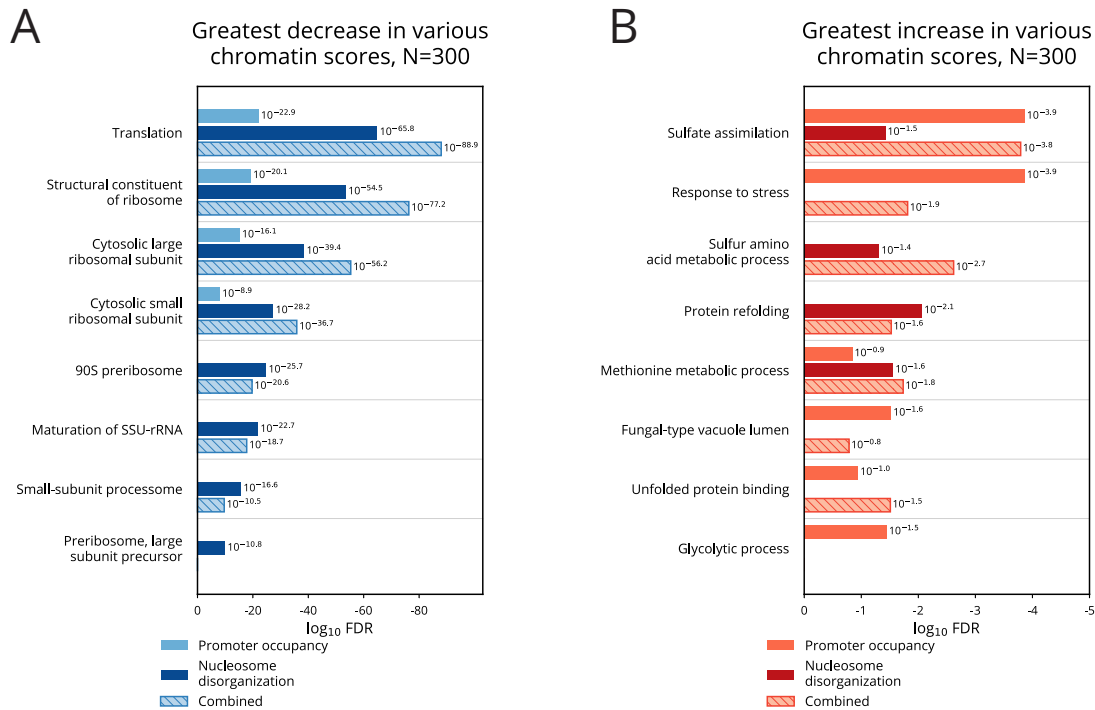

**Figure 4.** GO enrichment analysis of genes with highly dynamic chromatin support established cadmium response pathways. **(A)** GO enrichment analysis of 300 genes with greatest decrease in promoter occupancy, nucleosome disorganization, and combined chromatin score. Translation-related genes are recovered with significant FDR. **(B)** GO enrichment analysis of 300 genes with greatest increase in promoter occupancy, nucleosome disorganization, and combined chromatin score. Genes involved with stress response, sulfur assimilation, and protein folding pathways are recovered with significant FDR.

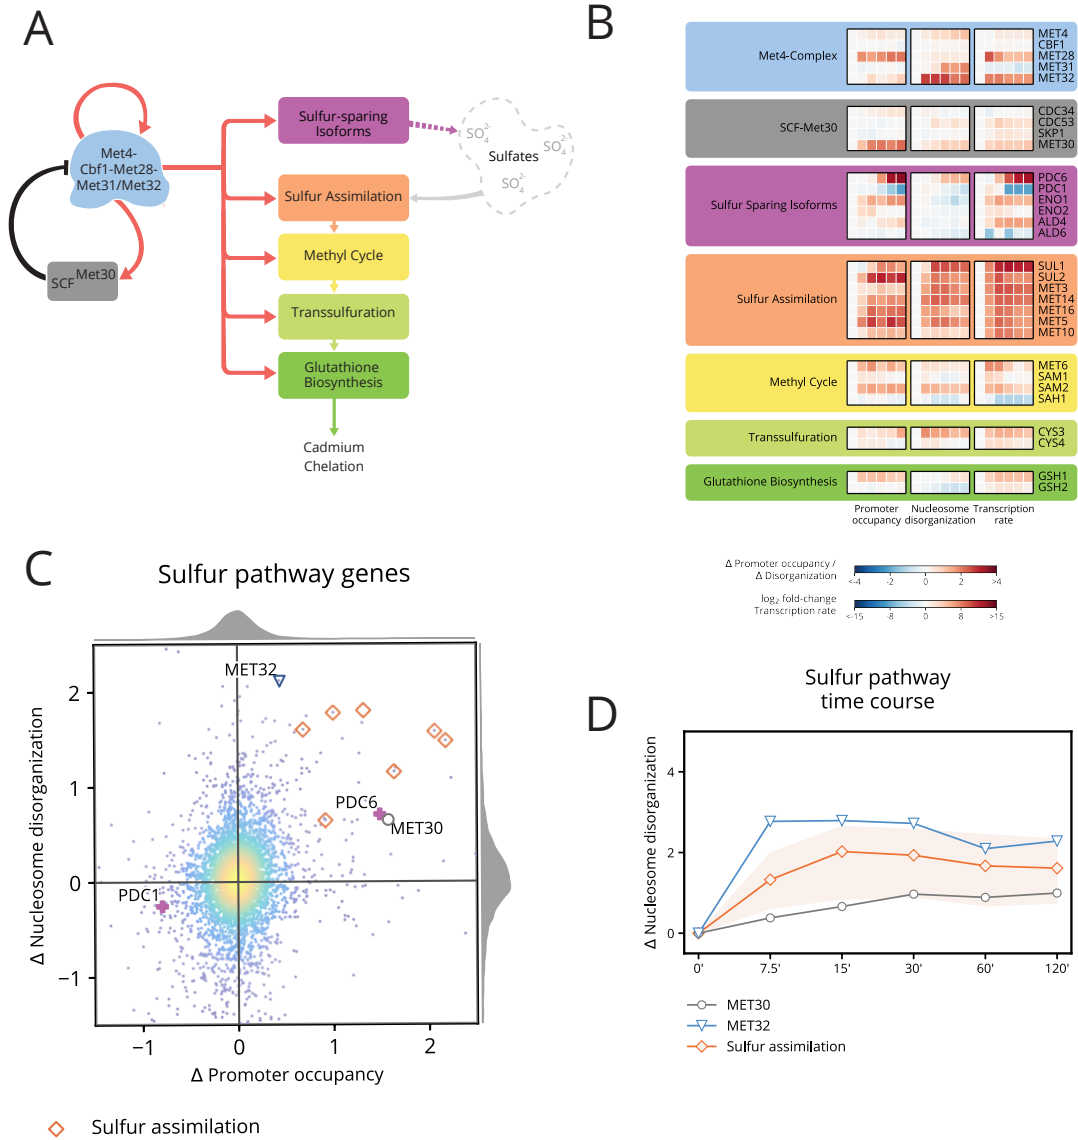



**Figure 5.** Chromatin and transcription dynamics detail Met4 and Met32 functional activation, induction of sulfur genes, and subsequent regulation. **(A)** Met4 complex activates cascading sulfur pathways required for cadmium chelation and is regulated by SCF<sup>Met30</sup> **(B)** Heatmap of changes in chromatin occupancy and transcription rate for the sulfur pathway genes. Cofactors of the Met4 complex exhibit dramatic chromatin changes in promoter occupancy (for MET28) and nucleosome disorganization (for MET32). Sulfur sparing isoforms exhibit inverse chromatin dynamics most pronounced between PDC6 and PDC1. Nearly all of the sulfur assimilation pathway have a dramatic increase in promoter small fragments and nucleosome disorganization. **(C)** Scatter plot of the average change in promoter occupancy and average change in nucleosome disorganization. Chromatin dynamics in sulfur-related genes may appear primarily through a change in a single measure of the chromatin, as with MET32 (blue triangle), MET30 (gray circle), and PDC6/PDC1 (violet), or as changes in both promoter occupancy and nucleosome disorganization, such as with the sulfur assimilation genes (orange diamonds) **(D)** Line plot of the change in nucleosome disorganization for the regulator gene MET30, activator MET32, and the sulfur assimilation genes—where the orange line represents the mean and the light orange region represents the entire range of values for the seven sulfur assimilation genes. Met4 complex cofactor MET32's disorganization is highest at 7.5 min while the sulfur assimilation genes and MET30, both of which are activated by the Met4 complex, reach their greatest nucleosome disorganization between 15–30 min.

551

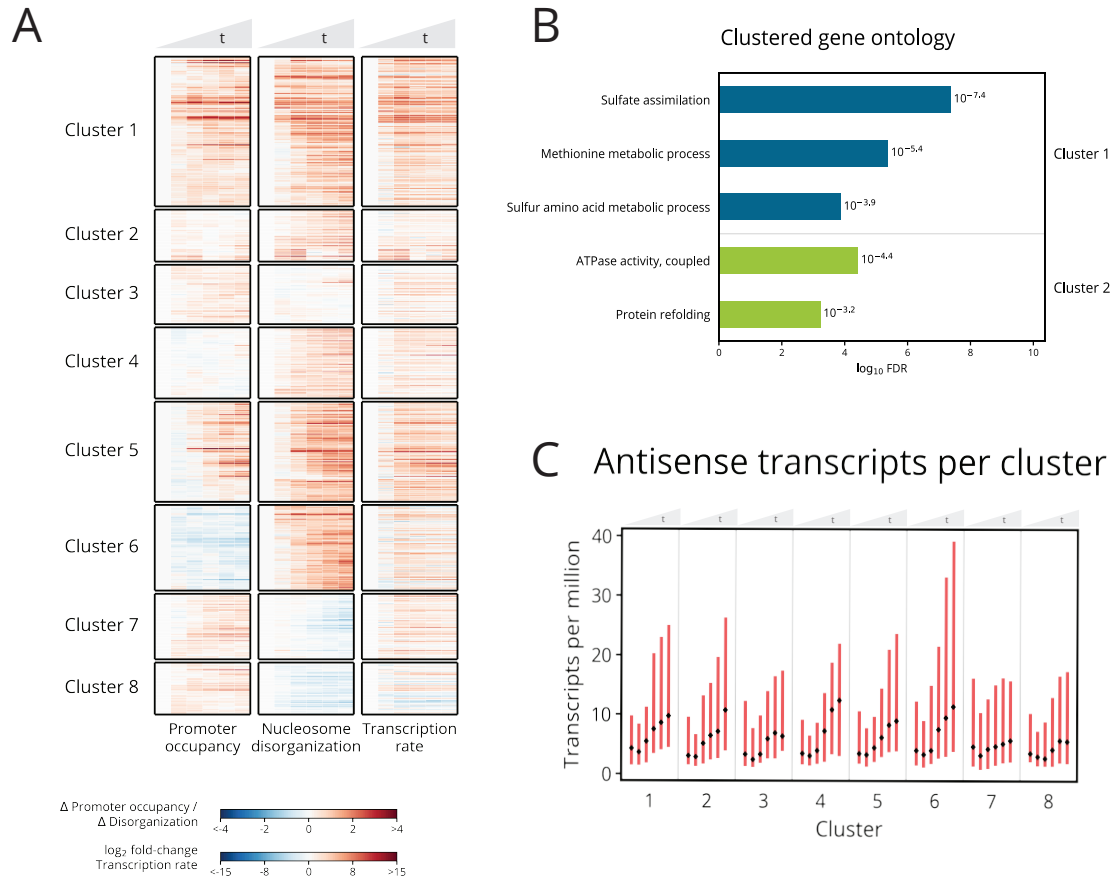

**Figure 6.** Small fragment promoter occupancy enrichment and gene body nucleosome disorganization reveal stress response pathway timing and patterns with antisense transcription. (A) Hierarchical clustering of 832 genes from the union of the 500 greatest increase in average promoter occupancy or 500 greatest increase in average nucleosome disorganization. Clusters 6–8 contain genes with anti-correlated chromatin dynamics. (B) GO enrichment analysis identifies clusters 1 and 2 for sulfur and protein refolding pathways respectively. (C) Antisense transcript level for each cluster across the time course. Cluster 6 shows enrichment of antisense transcripts matching increased nucleosome disorganization and decreased in promoter occupancy in A.

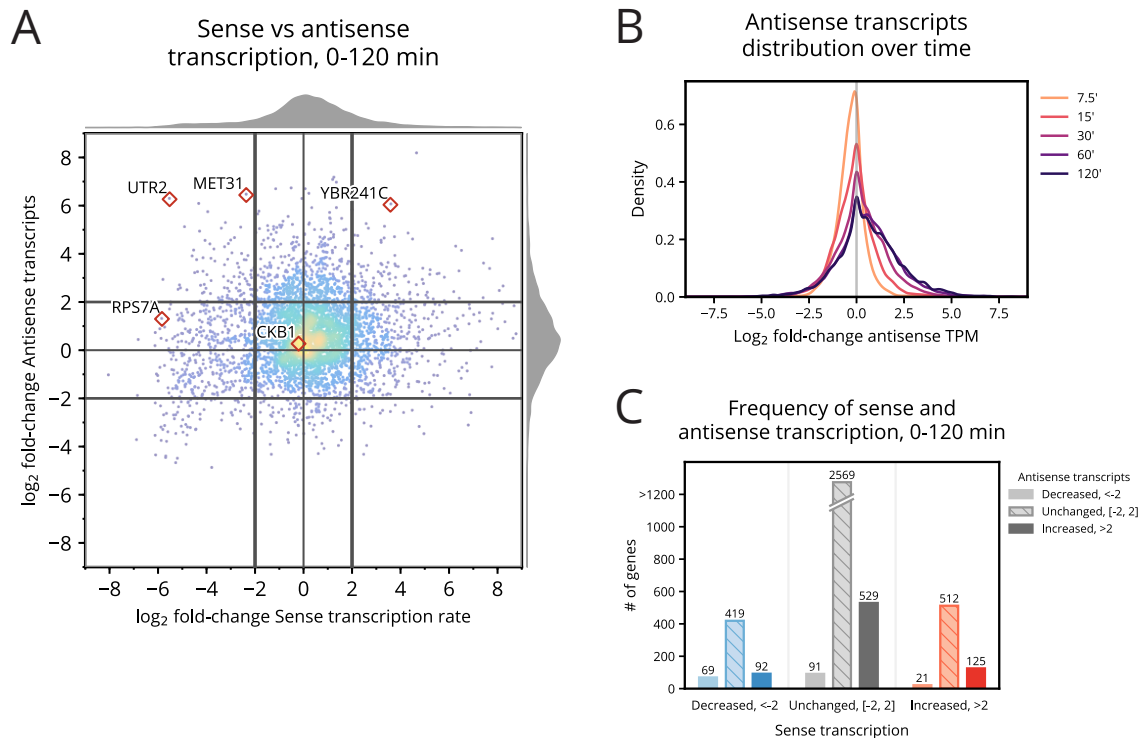

**Figure 7.** Cadmium induces changes in both sense and antisense transcription. **(A)** Distribution of the log<sub>2</sub> fold-change in sense transcription against the log<sub>2</sub> fold-change in antisense transcripts from 0–120 min. Antisense transcripts are enriched genome-wide by 120 min. **(B)** Distribution of the log<sub>2</sub> fold-change in antisense transcripts for each time point following 0 min. Antisense transcripts monotonically increase through the 120-min. **(C)** Counts of genes that exhibit decreased, unchanged, and increased sense and antisense transcripts from 0 and 120 minutes. Unchanging and increased sense transcription exhibit positively skewed enrichment of antisense transcripts.

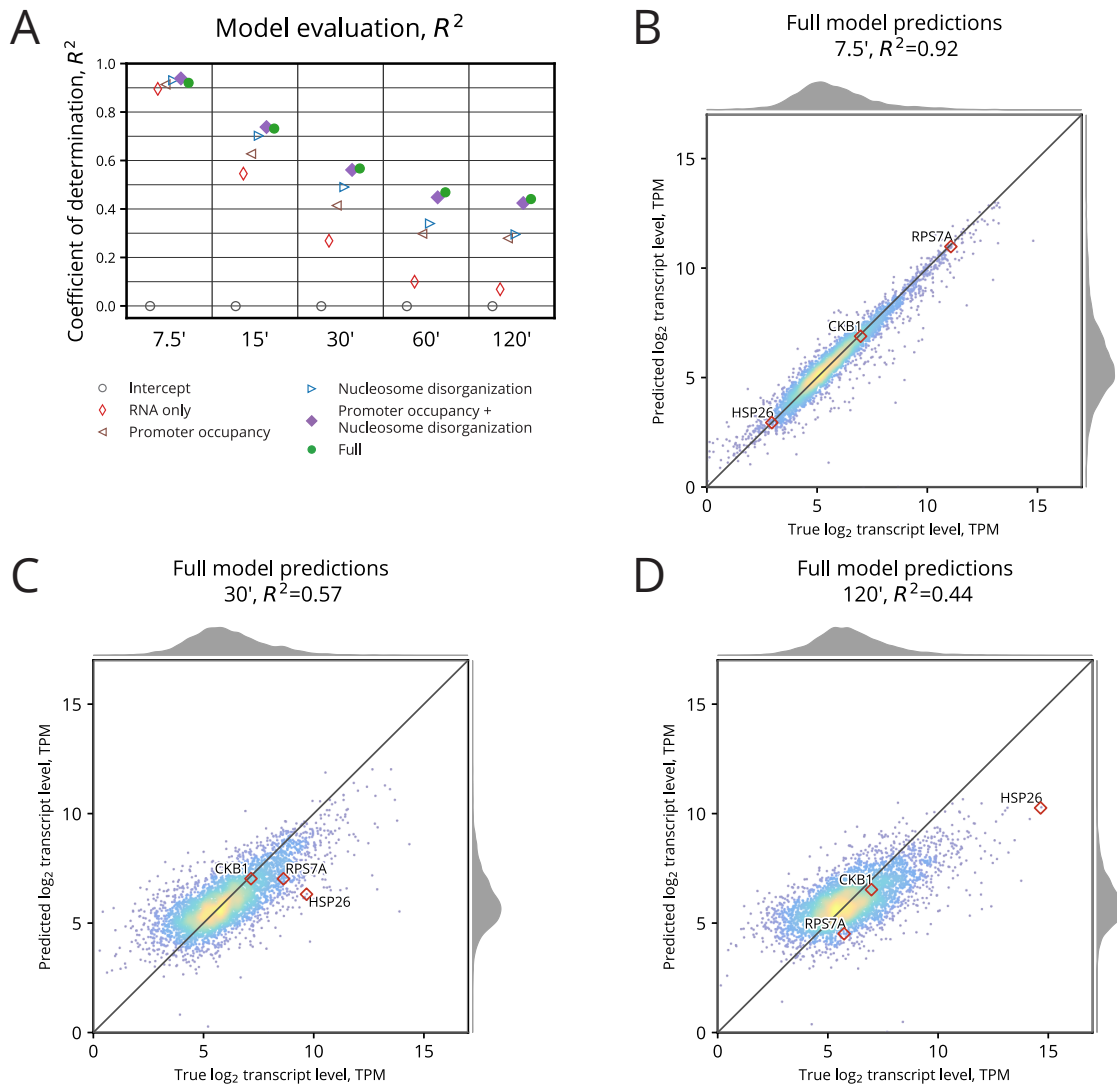

**Figure 8.** Chromatin occupancy dynamics are predictive of gene expression. **(A)** Comparison of each GP model's performance using its coefficient of determination,  $R^2$ . The Full model incorporating all chromatin features and 0 min transcript level outperforms all other models for 30–120 min. Later time points rely less on 0 min transcript level for prediction, so the marginal gain in statistical power between features becomes more evident. **(B)** Comparison between true and predicted  $\log_2$  transcript level for the Full model after 7.5 min. Most genes are well predicted using 0 min transcript level. **(C)** Full model predictions at 30 min. Predictions remain well correlated, but less than at 7.5 min. **(D)** Full model predictions at 120 min. After two full hours have elapsed, transcript level predictions have become a bit less correlated, but still,  $R^2$  remains 0.44.

## 552 **References**

- 553 Ashburner M, Ball CA, Blake JA, Botstein D, Butler H, Cherry JM, Davis AP, Dolinski K,  
554 Dwight SS, Eppig JT, Harris MA, Hill DP, Issel-Tarver L, Kasarskis A, Lewis S, Matese  
555 JC, Richardson JE, Ringwald M, Rubin GM, Sherlock G. 2000. Gene Ontology: Tool  
556 for the unification of biology. *Nat. Genet.* **25**: 25–29.
- 557 Barbey R, Baudouin-Cornu P, Lee TA, Rouillon A, Zarzov P, Tyers M, Thomas D. 2005.  
558 Inducible dissociation of SCF(Met30) ubiquitin ligase mediates a rapid transcrip-  
559 tional response to cadmium. *EMBO J.* **24**: 521–532.
- 560 Belsky JA, MacAlpine HK, Lubelsky Y, Hartemink AJ, MacAlpine DM. 2015. Genome-  
561 wide chromatin footprinting reveals changes in replication origin architecture in-  
562 duced by pre-RC assembly. *Genes Dev.* **29**: 212–224.
- 563 Benesch JLP, Aquilina JA, Baldwin AJ, Rekas A, Stengel F, Lindner RA, Basha E, Devlin  
564 GL, Horwitz J, Vierling E, Carver JA, Robinson CV. 2010. The quaternary organi-  
565 zation and dynamics of the molecular chaperone HSP26 are thermally regulated.  
566 *Chem. Biol.* **17**: 1008–1017.
- 567 Benjamini Y, Hochberg Y. 1995. Controlling the false discovery rate: A practical and  
568 powerful approach to multiple testing. *J. R. Stat. Soc. Series B Stat. Methodol.* **57**:  
569 289–300.
- 570 Blaiseau PL, Thomas D. 1998. Multiple transcriptional activation complexes tether the  
571 yeast activator Met4 to DNA. *EMBO J.* **17**: 6327–6336.
- 572 Blaiseau PL, Isnard AD, Surdin-Kerjan Y, Thomas D. 1997. Met31p and Met32p, two  
573 related zinc finger proteins, are involved in transcriptional regulation of yeast sulfur  
574 amino acid metabolism. *Mol. Cell. Biol.* **17**: 3640–3648.

- 575 Boy-Marcotte E, Lagniel G, Perrot M, Bussereau F, Boudsocq A, Jacquet M, Labarre J.  
576 1999. The heat shock response in yeast: Differential regulations and contributions  
577 of the Msn2p/Msn4p and Hsf1p regulons. *Mol. Microbiol.* **33**: 274–283.
- 578 Brahma S, Henikoff S. 2019. RSC-associated subnucleosomes define MNase-sensitive  
579 promoters in yeast. *Mol. Cell* **73**: 238–249.e3.
- 580 Brennan RJ, Schiestl RH. 1996. Cadmium is an inducer of oxidative stress in yeast.  
581 *Mutat. Res.* **356**: 171–178.
- 582 Brogaard K, Xi L, Wang JP, Widom J. 2012. A map of nucleosome positions in yeast at  
583 base-pair resolution. *Nature* **486**: 496–501.
- 584 Camblong J, Iglesias N, Fickentscher C, Dieppois G, Stutz F. 2007. Antisense RNA sta-  
585 bilization induces transcriptional gene silencing via histone deacetylation in *S. cere-*  
586 *visiae*. *Cell* **131**: 706–717.
- 587 Carrillo E, Ben-Ari G, Wildenhain J, Tyers M, Grammentz D, Lee TA. 2012. Character-  
588 izing the roles of Met31 and Met32 in coordinating Met4-activated transcription in  
589 the absence of Met30. *Mol. Biol. Cell* **23**: 1928–1942.
- 590 Cashikar AG, Duennwald M, Lindquist SL. 2005. A chaperone pathway in protein dis-  
591 aggregation: Hsp26 alters the nature of protein aggregates to facilitate reactivation  
592 by Hsp104. *J. Biol. Chem.* **280**: 23869–23875.
- 593 Chen J, Pederson DS. 1993. A distal heat shock element promotes the rapid response to  
594 heat shock of the HSP26 gene in the yeast *Saccharomyces cerevisiae*. *J. Biol. Chem.*  
595 **268**: 7442–7448.
- 596 Chereji RV, Ocampo J, Clark DJ. 2017. MNase-sensitive complexes in yeast: Nucleo-  
597 somes and non-histone barriers. *Mol. Cell* **65**: 565–577.e3.

- 598 Cormier L, Barbey R, Kuras L. 2010. Transcriptional plasticity through differential  
599 assembly of a multiprotein activation complex. *Nucleic Acids Res.* **38**: 4998–5014.
- 600 Dormer UH, Westwater J, McLaren NF, Kent NA, Mellor J, Jamieson DJ. 2000.  
601 Cadmium-inducible expression of the yeast GSH1 gene requires a functional sulfur-  
602 amino acid regulatory network. *J. Biol. Chem.* **275**: 32611–32616.
- 603 Faller P, Kienzler K, Krieger-Liszkay A. 2005. Mechanism of Cd<sup>2+</sup> toxicity: Cd<sup>2+</sup>  
604 inhibits photoactivation of Photosystem II by competitive binding to the essential  
605 Ca<sup>2+</sup> site. *Biochim. Biophys. Acta* **1706**: 158–164.
- 606 Fauchon M, Lagniel G, Aude JC, Lombardia L, Soularue P, Petat C, Marguerie G, Sen-  
607 tenac A, Werner M, Labarre J. 2002. Sulfur sparing in the yeast proteome in response  
608 to sulfur demand. *Mol. Cell* **9**: 713–723.
- 609 Franzmann TM, Menhorn P, Walter S, Buchner J. 2008. Activation of the chaperone  
610 Hsp26 is controlled by the rearrangement of its thermosensor domain. *Mol. Cell* **29**:  
611 207–216.
- 612 Gardarin A, Chédin S, Lagniel G, Aude JC, Godat E, Catty P, Labarre J. 2010. Endo-  
613 plasmic reticulum is a major target of cadmium toxicity in yeast. *Mol. Microbiol.* **76**:  
614 1034–1048.
- 615 Geisberg JV, Moqtaderi Z, Fan X, Oszolak F, Struhl K. 2014. Global analysis of mRNA  
616 isoform half-lives reveals stabilizing and destabilizing elements in yeast. *Cell* **156**:  
617 812–824.
- 618 Grant CE, Bailey TL, Noble WS. 2011. FIMO: scanning for occurrences of a given motif.  
619 *Bioinformatics* **27**: 1017–1018.
- 620 Hartwig A. 2001. Zinc finger proteins as potential targets for toxic metal ions: Differ-  
621 ential effects on structure and function. *Antioxid. Redox Signal.* **3**: 625–634.

- 622 Henikoff JG, Belsky JA, Krassovsky K, MacAlpine DM, Henikoff S. 2011. Epigenome  
623 characterization at single base-pair resolution. *Proc. Natl. Acad. Sci. U. S. A.* **108**:  
624 18318–18323.
- 625 Hosiner D, Gerber S, Lichtenberg-Fraté H, Glaser W, Schüller C, Klipp E. 2014. Impact  
626 of acute metal stress in *Saccharomyces cerevisiae*. *PLoS One* **9**: e83330.
- 627 Huisinga KL, Pugh BF. 2004. A genome-wide housekeeping role for TFIID and a highly  
628 regulated stress-related role for SAGA in *Saccharomyces cerevisiae*. *Mol. Cell* **13**:  
629 573–585.
- 630 Jin YH, Clark AB, Slebos RJC, Al-Refai H, Taylor JA, Kunkel TA, Resnick MA, Gordenin  
631 DA. 2003. Cadmium is a mutagen that acts by inhibiting mismatch repair. *Nat. Genet.*  
632 **34**: 326–329.
- 633 Jin YH, Dunlap PE, McBride SJ, Al-Refai H, Bushel PR, Freedman JH. 2008. Global  
634 transcriptome and deletome profiles of yeast exposed to transition metals. *PLoS*  
635 *Genet.* **4**: e1000053.
- 636 Kaiser P, Flick K, Wittenberg C, Reed SI. 2000. Regulation of transcription by ubiqui-  
637 tination without proteolysis: Cdc34/SCF(Met30)-mediated inactivation of the tran-  
638 scription factor Met4. *Cell* **102**: 303–314.
- 639 Kawahata M, Masaki K, Fujii T, Iefuji H. 2006. Yeast genes involved in response to  
640 lactic acid and acetic acid: Acidic conditions caused by the organic acids in *Sac-*  
641 *charomyces cerevisiae* cultures induce expression of intracellular metal metabolism  
642 genes regulated by Aft1p. *FEMS Yeast Res.* **6**: 924–936.
- 643 Kim TS, Liu CL, Yassour M, Holik J, Friedman N, Buratowski S, Rando OJ. 2010. RNA  
644 polymerase mapping during stress responses reveals widespread nonproductive tran-  
645 scription in yeast. *Genome Biol.* **11**: R75.



- 646 Klopfenstein DV, Zhang L, Pedersen BS, Ramírez F, Warwick Vesztrocy A, Naldi A,  
647 Mungall CJ, Yunes JM, Botvinnik O, Weigel M, Dampier W, Dessimoz C, Flick P,  
648 Tang H. 2018. GOATOOLS: A Python library for Gene Ontology analyses. *Sci. Rep.*  
649 **8**: 10872.
- 650 Kornienko AE, Guenzl PM, Barlow DP, Pauler FM. 2013. Gene regulation by the act of  
651 long non-coding RNA transcription. *BMC Biol.* **11**: 59.
- 652 Kubik S, Bruzzone MJ, Albert B, Shore D. 2017. A reply to “MNase-sensitive complexes  
653 in yeast: Nucleosomes and non-histone barriers,” by Chereji et al. *Mol. Cell* **65**:  
654 578–580.
- 655 Kulaeva OI, Hsieh FK, Studitsky VM. 2010. RNA polymerase complexes cooperate to  
656 relieve the nucleosomal barrier and evict histones. *Proc. Natl. Acad. Sci. U. S. A.* **107**:  
657 11325–11330.
- 658 Kuras L, Cherest H, Surdin-Kerjan Y, Thomas D. 1996. A heteromeric complex contain-  
659 ing the centromere binding factor 1 and two basic leucine zipper factors, Met4 and  
660 Met28, mediates the transcription activation of yeast sulfur metabolism. *EMBO J.*  
661 **15**: 2519–2529.
- 662 Kuras L, Rouillon A, Lee T, Barbey R, Tyers M, Thomas D. 2002. Dual regulation of  
663 the Met4 transcription factor by ubiquitin-dependent degradation and inhibition of  
664 promoter recruitment. *Mol. Cell* **10**: 69–80.
- 665 Langmead B, Trapnell C, Pop M, Salzberg SL. 2009. Ultrafast and memory-efficient  
666 alignment of short DNA sequences to the human genome. *Genome Biol.* **10**: R25.
- 667 Lee CK, Shibata Y, Rao B, Strahl BD, Lieb JD. 2004. Evidence for nucleosome depletion  
668 at active regulatory regions genome-wide. *Nat. Genet.* **36**: 900–905.

- 669 Lubliner S, Keren L, Segal E. 2013. Sequence features of yeast and human core pro-  
670 moters that are predictive of maximal promoter activity. *Nucleic Acids Res.* **41**: 5569–  
671 5581.
- 672 MacIsaac KD, Wang T, Gordon DB, Gifford DK, Stormo GD, Fraenkel E. 2006. An im-  
673 proved map of conserved regulatory sites for *Saccharomyces cerevisiae*. *BMC Bioin-*  
674 *formatics* **7**: 113.
- 675 McIsaac RS, Petti AA, Bussemaker HJ, Botstein D. 2012. Perturbation-based analysis  
676 and modeling of combinatorial regulation in the yeast sulfur assimilation pathway.  
677 *Mol. Biol. Cell* **23**: 2993–3007.
- 678 Miller C, Schwalb B, Maier K, Schulz D, Dümcke S, Zacher B, Mayer A, Sydow J, Mar-  
679 cinowski L, Dölken L, Martin DE, Tresch A, Cramer P. 2011. Dynamic transcriptome  
680 analysis measures rates of mRNA synthesis and decay in yeast. *Mol. Syst. Biol.* **7**:  
681 458.
- 682 Miller KA, DiDone L, Krysan DJ. 2010. Extracellular secretion of overexpressed  
683 glycosylphosphatidylinositol-linked cell wall protein Utr2/Crh2p as a novel protein  
684 quality control mechanism in *saccharomyces cerevisiae*. *Eukaryot. Cell* **9**: 1669–  
685 1679.
- 686 Momose Y, Iwahashi H. 2001. Bioassay of cadmium using a DNA microarray: Genome-  
687 wide expression patterns of *Saccharomyces cerevisiae* response to cadmium. *Environ.*  
688 *Toxicol. Chem.* **20**: 2353–2360.
- 689 Nadal-Ribelles M, Solé C, Xu Z, Steinmetz LM, de Nadal E, Posas F. 2014. Control of  
690 Cdc28 CDK1 by a stress-induced lncRNA. *Mol. Cell* **53**: 549–561.
- 691 Nocetti N, Whitehouse I. 2016. Nucleosome repositioning underlies dynamic gene  
692 expression. *Genes Dev.* **30**: 660–672.

- 693 Ouni I, Flick K, Kaiser P. 2010. A transcriptional activator is part of an SCF ubiquitin  
694 ligase to control degradation of its cofactors. *Mol. Cell* **40**: 954–964.
- 695 Park D, Morris AR, Battenhouse A, Iyer VR. 2014. Simultaneous mapping of tran-  
696 script ends at single-nucleotide resolution and identification of widespread promoter-  
697 associated non-coding RNA governed by TATA elements. *Nucleic Acids Res.* **42**: 3736–  
698 3749.
- 699 Patton EE, Peyraud C, Rouillon A, Surdin-Kerjan Y, Tyers M, Thomas D. 2000.  
700 SCF(Met30)-mediated control of the transcriptional activator Met4 is required for  
701 the G(1)-S transition. *EMBO J.* **19**: 1613–1624.
- 702 Pedregosa F, Varoquaux G, Gramfort A, Michel V, Thirion B, Grisel O, Blondel M, Pret-  
703 tenhofer P, Weiss R, Dubourg V, Vanderplas J, Passos A, Cournapeau D, Brucher M,  
704 Perrot M, Duchesnay E. 2011. Scikit-learn: Machine learning in Python. *Journal of*  
705 *Machine Learning Research* **12**: 2825–2830.
- 706 Pereira Y, Lagniel G, Godat E, Baudouin-Cornu P, Junot C, Labarre J. 2008. Chromate  
707 causes sulfur starvation in yeast. *Toxicol. Sci.* **106**: 400–412.
- 708 Petti AA, McIsaac RS, Ho-Shing O, Bussemaker HJ, Botstein D. 2012. Combinatorial  
709 control of diverse metabolic and physiological functions by transcriptional regulators  
710 of the yeast sulfur assimilation pathway. *Mol. Biol. Cell* **23**: 3008–3024.
- 711 Presnyak V, Alhusaini N, Chen YH, Martin S, Morris N, Kline N, Olson S, Weinberg D,  
712 Baker KE, Graveley BR, Collier J. 2015. Codon optimality is a major determinant of  
713 mRNA stability. *Cell* **160**: 1111–1124.
- 714 Rabani M, Levin JZ, Fan L, Adiconis X, Raychowdhury R, Garber M, Gnirke A, Nusbaum  
715 C, Hacohen N, Friedman N, Amit I, Regev A. 2011. Metabolic labeling of RNA un-  
716 covers principles of RNA production and degradation dynamics in mammalian cells.  
717 *Nat. Biotechnol.* **29**: 436–442.

- 718 Ramachandran S, Ahmad K, Henikoff S. 2017. Transcription and remodeling produce  
719 asymmetrically unwrapped nucleosomal intermediates. *Mol. Cell* **68**: 1038–1053.e4.
- 720 Reja R, Vinayachandran V, Ghosh S, Pugh BF. 2015. Molecular mechanisms of riboso-  
721 mal protein gene coregulation. *Genes Dev.* **29**: 1942–1954.
- 722 Rhee HS, Pugh BF. 2012. Genome-wide structure and organization of eukaryotic pre-  
723 initiation complexes. *Nature* **483**: 295–301.
- 724 Schwabish MA, Struhl K. 2004. Evidence for eviction and rapid deposition of histones  
725 upon transcriptional elongation by RNA polymerase II. *Mol. Cell. Biol.* **24**: 10111–  
726 10117.
- 727 Sharma SK, Goloubinoff P, Christen P. 2008. Heavy metal ions are potent inhibitors of  
728 protein folding. *Biochem. Biophys. Res. Commun.* **372**: 341–345.
- 729 Shivaswamy S, Iyer VR. 2008. Stress-dependent dynamics of global chromatin remod-  
730 eling in yeast: Dual role for SWI/SNF in the heat shock stress response. *Mol. Cell.*  
731 *Biol.* **28**: 2221–2234.
- 732 Smale ST, Kadonaga JT. 2003. The RNA polymerase II core promoter. *Annu. Rev.*  
733 *Biochem.* **72**: 449–479.
- 734 Susek RE, Lindquist S. 1990. Transcriptional derepression of the *Saccharomyces cere-*  
735 *visiae* HSP26 gene during heat shock. *Mol. Cell. Biol.* **10**: 6362–6373.
- 736 Swamy KBS, Lin CH, Yen MR, Wang CY, Wang D. 2014. Examining the condition-  
737 specific antisense transcription in *S. cerevisiae* and *S. paradoxus*. *BMC Genomics* **15**:  
738 521.
- 739 Teves SS, Henikoff S. 2011. Heat shock reduces stalled RNA polymerase II and nucle-  
740 osome turnover genome-wide. *Genes Dev.* **25**: 2387–2397.

- 741 The Gene Ontology Consortium. 2019. The Gene Ontology Resource: 20 years and still  
742 GOing strong. *Nucleic Acids Res.* **47**: D330–D338.
- 743 Till P, Mach RL, Mach-Aigner AR. 2018. A current view on long noncoding RNAs in  
744 yeast and filamentous fungi. *Appl. Microbiol. Biotechnol.* **102**: 7319–7331.
- 745 Toesca I, Nery CR, Fernandez CF, Sayani S, Chanfreau GF. 2011. Cryptic transcrip-  
746 tion mediates repression of subtelomeric metal homeostasis genes. *PLoS Genet.* **7**:  
747 e1002163.
- 748 Treger JM, Schmitt AP, Simon JR, McEntee K. 1998. Transcriptional factor mutations  
749 reveal regulatory complexities of heat shock and newly identified stress genes in  
750 *Saccharomyces cerevisiae*. *J. Biol. Chem.* **273**: 26875–26879.
- 751 Tripuraneni V, Memisoglu G, Zhu W, Tran T, Hartemink AJ, Haber JE, MacAlpine DM.  
752 2019. Local nucleosome dynamics and eviction following a double-strand break are  
753 reversible by NHEJ-mediated repair in the absence of DNA replication. *bioRxiv* page  
754 866673.
- 755 Vance KW, Ponting CP. 2014. Transcriptional regulatory functions of nuclear long non-  
756 coding RNAs. *Trends Genet.* **30**: 348–355.
- 757 Venters BJ, Wachi S, Mavrich TN, Andersen BE, Jena P, Sinnamon AJ, Jain P, Rolleri NS,  
758 Jiang C, Hemeryck-Walsh C, Pugh BF. 2011. A comprehensive genomic binding map  
759 of gene and chromatin regulatory proteins in *Saccharomyces*. *Mol. Cell* **41**: 480–492.
- 760 Vinayachandran V, Reja R, Rossi MJ, Park B, Rieber L, Mittal C, Mahony S, Pugh BF.  
761 2018. Widespread and precise reprogramming of yeast protein-genome interactions  
762 in response to heat shock. *Genome Res.* **28**: 357–366.
- 763 Virtanen P, Gommers R, Oliphant TE, Haberland M, Reddy T, Cournapeau D, Burovski  
764 E, Peterson P, Weckesser W, Bright J, van der Walt SJ, Brett M, Wilson J, Jarrod

- 765 Millman K, Mayorov N, Nelson ARJ, Jones E, Kern R, Larson E, Carey C, Polat İ,  
766 Feng Y, Moore EW, Vand erPlas J, Laxalde D, Perktold J, Cimrman R, Henriksen I,  
767 Quintero EA, Harris CR, Archibald AM, Ribeiro AH, Pedregosa F, van Mulbregt P,  
768 Contributors S. 2020. SciPy 1.0: Fundamental algorithms for scientific computing in  
769 Python. *Nature Methods* **17**: 261–272.
- 770 Wagner GP, Kin K, Lynch VJ. 2012. Measurement of mRNA abundance using RNA-seq  
771 data: RPKM measure is inconsistent among samples. *Theory Biosci.* **131**: 281–285.
- 772 Ward JH. 1963. Hierarchical grouping to optimize an objective function. *J. Am. Stat.*  
773 *Assoc.* **58**: 236–244.
- 774 Weiner A, Chen HV, Liu CL, Rahat A, Klien A, Soares L, Gudipati M, Pfeffner J, Regev  
775 A, Buratowski S, Pleiss JA, Friedman N, Rando OJ. 2012. Systematic dissection of  
776 roles for chromatin regulators in a yeast stress response. *PLoS Biol.* **10**: e1001369.
- 777 Weiner A, Hsieh THS, Appleboim A, Chen HV, Rahat A, Amit I, Rando OJ, Friedman N.  
778 2015. High-resolution chromatin dynamics during a yeast stress response. *Mol. Cell*  
779 **58**: 371–386.
- 780 Wiederhold E, Gandhi T, Permentier HP, Breitling R, Poolman B, Slotboom DJ. 2009.  
781 The yeast vacuolar membrane proteome. *Mol. Cell. Proteomics* **8**: 380–392.
- 782 Wilhelm BT, Marguerat S, Watt S, Schubert F, Wood V, Goodhead I, Penkett CJ, Rogers  
783 J, Bähler J. 2008. Dynamic repertoire of a eukaryotic transcriptome surveyed at  
784 single-nucleotide resolution. *Nature* **453**: 1239–1243.
- 785 Yang E, van Nimwegen E, Zavolan M, Rajewsky N, Schroeder M, Magnasco M, Darnell  
786 Jr JE. 2003. Decay rates of human mRNAs: Correlation with functional characteris-  
787 tics and sequence attributes. *Genome Res.* **13**: 1863–1872.
